# Supplementary material for: Prolonged repeated vaccine immuno-chemotherapy induces long-term clinical responses and survival for advanced metastatic melanoma
Source: PubMed Central journal article supplement (PMC4950896; doi:10.1186/2051-1426-2-9), 2014-04-15

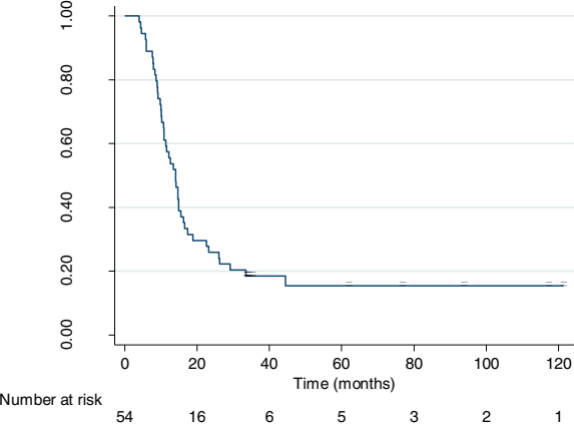

Supplement: 40425_2013_407_MOESM1_ESM.pdf [file 40425_2013_407_MOESM1_ESM.pdf]
